# Supplementary material for: Discovery of a First-In-Class Small Molecule Antagonist against the Adrenomedullin-2 Receptor: Structure–Activity Relationships and Optimization
Source: PubMed Central journal article supplement (PMC8006142; doi:10.1021/acs.jmedchem.0c02191), 2021-03-05

# Supporting Information

## Discovery of a First-in-Class Small Molecule Antagonist Against the Adrenomedullin-2 Receptor: Structure-Activity Relationships and Optimization

5

Jean-Olivier Zirimwabagabo<sup>1#</sup>, Ameera B. A. Jailani<sup>2#</sup>, Paris Avgoustou<sup>2#</sup>, Matthew J. Tozer<sup>3</sup>, Karl R. Gibson<sup>4</sup>, Paul A. Glossop<sup>4</sup>, James E. J. Mills<sup>4</sup>, Roderick A. Porter<sup>5</sup>, Paul Blaney<sup>6</sup>, Ning Wang<sup>2</sup>, Timothy M. Skerry<sup>2#</sup>, Gareth O. Richards<sup>2#</sup> and Joseph P. A. Harrity<sup>1\*#</sup>

10

1. Department of Chemistry, University of Sheffield, S10 2TN, UK
2. Department of Oncology and Metabolism, University of Sheffield, S10 2TN, UK
3. Matt Tozer Consultancy, Bognor Regis, PO21 1DY, UK
4. Sandexis Medicinal Chemistry Ltd, Sandwich, Kent, CT13 9ND, UK
5. Rod Porter Consultancy, Ashwell, Hertfordshire, SG7 5PG, UK
6. Concept Life Sciences, High Peak, SK23 0PG, UK

15

# These authors contributed equally to the work

20

\*Correspondence to Joseph P. A. Harrity

Email: [j.harrity@sheffield.ac.uk](mailto:j.harrity@sheffield.ac.uk)

## 25 Table of Contents

|                                                                                      |     |
|--------------------------------------------------------------------------------------|-----|
| 1. X-Ray crystal structure analysis of ( <i>R</i> )-CLR binding unit <b>30</b> ..... | S2  |
| 2. <sup>1</sup> H NMR /LCMS/HPLC Traces of Compound <b>12</b> .....                  | S11 |
| 3. <sup>1</sup> H NMR /LCMS/HPLC Traces of Compound <b>14</b> .....                  | S14 |
| 4. <sup>1</sup> H NMR /LCMS/HPLC Traces of Compound ( $\pm$ )- <b>25</b> .....       | S16 |
| 5. <sup>1</sup> H NMR /LCMS/HPLC Traces of Compound ( <i>R</i> )- <b>25</b> .....    | S18 |

30

## X-Ray crystal structure analysis of (*R*)-CLR binding unit 30

This compound was crystallised from methanol through slow evaporation at room temperature. The requisite CIF has been deposited with the **CCDC 2027033** contains the supplementary crystallographic data for this paper. These data are provided free of charge  
5 by the joint Cambridge Crystallographic Data Centre and Fachinformationszentrum Karlsruhe Access Structures service [www.ccdc.cam.ac.uk/structures](http://www.ccdc.cam.ac.uk/structures).

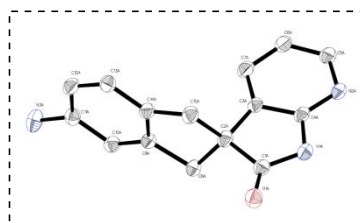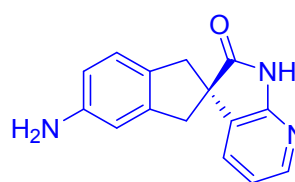

**Table 1 Crystal data and structure refinement for 2018ncs0092s.**

|                       |                                                  |
|-----------------------|--------------------------------------------------|
| Identification code   | 2018ncs0092s                                     |
| Empirical formula     | C <sub>15</sub> H <sub>13</sub> N <sub>3</sub> O |
| Formula weight        | 251.28                                           |
| Temperature/K         | 99.99(10)                                        |
| Crystal system        | monoclinic                                       |
| Space group           | P2 <sub>1</sub>                                  |
| a/Å                   | 8.71373(14)                                      |
| b/Å                   | 15.1311(2)                                       |
| c/Å                   | 9.8448(2)                                        |
| α/°                   | 90                                               |
| β/°                   | 113.968(2)                                       |
| γ/°                   | 90                                               |
| Volume/Å <sup>3</sup> | 1186.09(4)                                       |
| Z                     | 4                                                |

|                                                |                                                               |
|------------------------------------------------|---------------------------------------------------------------|
| $\rho_{\text{calc}}/\text{g}/\text{cm}^3$      | 1.407                                                         |
| $\mu/\text{mm}^{-1}$                           | 0.735                                                         |
| F(000)                                         | 528.0                                                         |
| Crystal size/ $\text{mm}^3$                    | $0.19 \times 0.05 \times 0.02$                                |
| Radiation                                      | CuK $\alpha$ ( $\lambda = 1.54178$ )                          |
| 2 $\Theta$ range for data collection/ $^\circ$ | 9.832 to 136.488                                              |
| Index ranges                                   | $-10 \leq h \leq 10, -18 \leq k \leq 18, -11 \leq l \leq 11$  |
| Reflections collected                          | 15858                                                         |
| Independent reflections                        | 4251 [ $R_{\text{int}} = 0.0388, R_{\text{sigma}} = 0.0337$ ] |
| Data/restraints/parameters                     | 4251/1/367                                                    |
| Goodness-of-fit on $F^2$                       | 1.133                                                         |
| Final R indexes [ $ I  \geq 2\sigma(I)$ ]      | $R_1 = 0.0370, wR_2 = 0.1018$                                 |
| Final R indexes [all data]                     | $R_1 = 0.0394, wR_2 = 0.1036$                                 |
| Largest diff. peak/hole / $e \text{ \AA}^{-3}$ | 0.15/-0.19                                                    |
| Flack parameter                                | 0.01(17)                                                      |

**Table 2 Fractional Atomic Coordinates ( $\times 10^4$ ) and Equivalent Isotropic Displacement Parameters ( $\text{\AA}^2 \times 10^3$ ) for 2018ncs0092s.  $U_{\text{eq}}$  is defined as 1/3 of of the trace of the orthogonalised  $U_{ij}$  tensor.**

| Atom | x        | y          | z        | U(eq)   |
|------|----------|------------|----------|---------|
| O1A  | -804(3)  | 7015.7(16) | 7338(3)  | 30.0(6) |
| N1A  | -1450(3) | 5967(2)    | 8720(3)  | 23.9(6) |
| N2A  | -1494(3) | 4654.8(18) | 10065(3) | 22.8(6) |
| N3A  | 3022(3)  | 3642(2)    | 3543(3)  | 32.8(6) |
| C1A  | -722(4)  | 6264(2)    | 7804(3)  | 23.0(7) |

|      |          |            |          |         |
|------|----------|------------|----------|---------|
| C2A  | 244(4)   | 5491(2)    | 7508(3)  | 22.3(7) |
| C3A  | -27(3)   | 4765(2)    | 8429(3)  | 21.0(7) |
| C4A  | -1027(3) | 5090(2)    | 9126(3)  | 21.5(7) |
| C5A  | -919(4)  | 3808(2)    | 10333(3) | 24.2(7) |
| C6A  | 40(4)    | 3419(2)    | 9687(4)  | 27.1(8) |
| C7A  | 505(4)   | 3903(2)    | 8699(4)  | 25.9(8) |
| C8A  | -384(4)  | 5247(2)    | 5837(4)  | 23.1(7) |
| C9A  | 1174(4)  | 4880(2)    | 5726(4)  | 21.8(7) |
| C10A | 1287(4)  | 4373(2)    | 4600(3)  | 23.3(7) |
| C11A | 2880(4)  | 4126(2)    | 4693(3)  | 23.7(7) |
| C12A | 4312(4)  | 4394(2)    | 5915(4)  | 27.2(8) |
| C13A | 4180(4)  | 4911(2)    | 7029(4)  | 25.5(8) |
| C14A | 2600(4)  | 5151(2)    | 6935(3)  | 22.7(7) |
| C15A | 2136(4)  | 5713(2)    | 7969(3)  | 25.9(8) |
| O1B  | 5965(3)  | 4516.4(16) | 2856(3)  | 28.6(5) |
| N1B  | 6371(3)  | 5526(2)    | 1286(3)  | 23.8(6) |
| N2B  | 6375(3)  | 6839.8(18) | -73(3)   | 23.7(6) |
| N3B  | -1043(3) | 7369.4(18) | 3878(3)  | 29.9(6) |
| C1B  | 5741(4)  | 5248(2)    | 2293(3)  | 22.8(7) |
| C2B  | 4744(3)  | 6013(2)    | 2567(3)  | 22.3(7) |
| C3B  | 4983(3)  | 6735(2)    | 1620(3)  | 21.6(7) |
| C4B  | 5930(3)  | 6404(2)    | 881(3)   | 21.2(7) |
| C5B  | 5827(4)  | 7687(2)    | -327(3)  | 24.3(7) |
| C6B  | 4916(4)  | 8086(2)    | 361(4)   | 26.2(8) |
| C7B  | 4472(4)  | 7602(2)    | 1364(4)  | 24.8(7) |
| C8B  | 2845(3)  | 5787(2)    | 2080(3)  | 23.0(7) |

|      |         |         |         |         |
|------|---------|---------|---------|---------|
| C9B  | 2355(4) | 6358(2) | 3094(3) | 21.7(7) |
| C10B | 760(4)  | 6606(2) | 2930(4) | 22.4(7) |
| C11B | 565(3)  | 7131(2) | 4011(3) | 22.5(7) |
| C12B | 1986(4) | 7394(2) | 5257(4) | 26.8(8) |
| C13B | 3579(4) | 7124(2) | 5425(3) | 25.6(7) |
| C14B | 3776(4) | 6623(2) | 4326(3) | 22.6(7) |
| C15B | 5348(4) | 6263(2) | 4242(3) | 23.7(7) |

**Table 3 Anisotropic Displacement Parameters ( $\text{\AA}^2 \times 10^3$ ) for 2018ncs0092s. The**

**Anisotropic displacement factor exponent takes the form: -**

$$2\pi^2[h^2a^2U_{11}+2hka*b*U_{12}+...].$$

| Atom | $U_{11}$ | $U_{22}$ | $U_{33}$ | $U_{23}$  | $U_{13}$ | $U_{12}$ |
|------|----------|----------|----------|-----------|----------|----------|
| O1A  | 33.6(12) | 25.4(14) | 35.8(13) | 1.5(10)   | 19.2(10) | 0.5(10)  |
| N1A  | 21.4(13) | 25.1(15) | 26.6(14) | -1.8(12)  | 11.0(11) | 2.6(11)  |
| N2A  | 15.9(12) | 26.2(16) | 26.1(13) | -1.0(12)  | 8.3(10)  | 0.4(11)  |
| N3A  | 30.3(13) | 33.2(14) | 40.8(15) | -11.2(12) | 20.6(12) | -3.0(12) |
| C1A  | 19.2(15) | 24.6(18) | 24.0(16) | -1.5(14)  | 7.6(12)  | -1.3(13) |
| C2A  | 17.3(13) | 25.9(18) | 23.7(15) | -2.7(13)  | 8.2(12)  | -1.4(13) |
| C3A  | 12.7(13) | 26.9(19) | 21.6(15) | -0.8(13)  | 5.1(12)  | -0.5(12) |
| C4A  | 14.7(12) | 25.9(19) | 22.0(15) | -2.3(14)  | 5.6(11)  | 0.3(13)  |
| C5A  | 18.7(14) | 27(2)    | 26.1(16) | 0.4(15)   | 8.3(13)  | -0.9(13) |
| C6A  | 22.7(15) | 26.4(19) | 32.3(19) | 2.6(14)   | 11.3(14) | 3.5(13)  |
| C7A  | 19.3(15) | 30(2)    | 27.7(16) | -0.5(14)  | 9.1(13)  | 4.1(13)  |
| C8A  | 18.6(14) | 26(2)    | 25.6(16) | 0.8(14)   | 10.2(13) | -0.1(13) |
| C9A  | 19.4(14) | 23.7(18) | 22.9(16) | 2.4(13)   | 9.2(12)  | 1.3(12)  |

|      |          |          |          |          |          |          |
|------|----------|----------|----------|----------|----------|----------|
| C10A | 20.9(14) | 23.1(18) | 25.1(16) | 0.7(14)  | 8.5(12)  | -1.0(12) |
| C11A | 26.1(15) | 21.3(16) | 27.2(16) | -1.0(14) | 14.3(13) | -0.2(13) |
| C12A | 19.7(14) | 28(2)    | 35.5(18) | 5.8(15)  | 13.2(14) | 3.2(13)  |
| C13A | 19.6(14) | 31(2)    | 26.8(18) | 2.2(14)  | 10.3(13) | -1.5(13) |
| C14A | 19.2(14) | 23.7(19) | 26.3(16) | 2.7(14)  | 10.2(12) | -0.5(13) |
| C15A | 19.8(15) | 32(2)    | 26.2(17) | -1.8(15) | 9.4(13)  | -2.5(14) |
| O1B  | 26.2(11) | 27.8(14) | 34.5(13) | 4.3(11)  | 15(1)    | 2.5(10)  |
| N1B  | 20.3(12) | 25.2(15) | 28.9(14) | 1.6(12)  | 13.0(11) | 1.6(11)  |
| N2B  | 19.3(12) | 27.7(17) | 24.5(14) | -1.0(12) | 9.3(10)  | -1.5(11) |
| N3B  | 21.0(12) | 36.8(15) | 32.7(14) | -2.8(12) | 11.7(11) | 4.7(10)  |
| C1B  | 15.5(13) | 29(2)    | 24.0(16) | -1.9(14) | 8.4(12)  | -1.2(13) |
| C2B  | 16.2(14) | 25.9(19) | 26.2(16) | 0.4(14)  | 10.2(13) | 0.3(13)  |
| C3B  | 12.6(13) | 28.4(19) | 22.0(16) | -3.4(13) | 5.1(12)  | -0.1(13) |
| C4B  | 13.2(13) | 23.1(18) | 24.0(15) | -2.4(14) | 4.3(12)  | -0.8(12) |
| C5B  | 20.5(16) | 27(2)    | 24.7(17) | 2.1(14)  | 8.8(13)  | -1.3(13) |
| C6B  | 24.0(14) | 25.1(19) | 28.7(19) | -0.7(14) | 9.9(14)  | 1.4(14)  |
| C7B  | 18.7(15) | 30(2)    | 26.6(16) | -1.8(14) | 9.9(13)  | 2.2(13)  |
| C8B  | 17.2(15) | 29(2)    | 24.1(16) | -3.3(14) | 9.4(13)  | -2.1(13) |
| C9B  | 19.9(14) | 24.8(19) | 20.6(15) | 0.2(13)  | 8.4(12)  | -2.0(13) |
| C10B | 16.3(14) | 25.3(19) | 24.3(17) | -0.6(13) | 6.9(12)  | -1.8(12) |
| C11B | 20.4(14) | 24.4(19) | 25.2(16) | 1.9(14)  | 11.8(12) | 0.6(12)  |
| C12B | 27.0(15) | 27.4(19) | 29.8(17) | -1.9(15) | 15.3(14) | -1.0(14) |
| C13B | 22.4(14) | 32(2)    | 22.1(15) | -4.4(15) | 8.4(12)  | -4.5(13) |
| C14B | 16.9(14) | 27.0(19) | 22.6(17) | 0.6(13)  | 6.7(12)  | -3.2(13) |
| C15B | 18.6(15) | 32(2)    | 20.1(16) | -0.9(14) | 7.2(12)  | -1.7(14) |

**Table 4 Bond Lengths for 2018ncs0092s.**

| Atom Atom | Length/Å | Atom Atom | Length/Å |
|-----------|----------|-----------|----------|
| O1A C1A   | 1.218(4) | O1B C1B   | 1.218(4) |
| N1A C1A   | 1.371(4) | N1B C1B   | 1.379(4) |
| N1A C4A   | 1.393(4) | N1B C4B   | 1.397(4) |
| N2A C4A   | 1.326(4) | N2B C4B   | 1.327(4) |
| N2A C5A   | 1.362(4) | N2B C5B   | 1.356(4) |
| N3A C11A  | 1.396(4) | N3B C11B  | 1.400(4) |
| C1A C2A   | 1.536(4) | C1B C2B   | 1.535(4) |
| C2A C3A   | 1.503(5) | C2B C3B   | 1.505(5) |
| C2A C8A   | 1.552(4) | C2B C8B   | 1.562(4) |
| C2A C15A  | 1.558(4) | C2B C15B  | 1.560(4) |
| C3A C4A   | 1.399(4) | C3B C4B   | 1.396(4) |
| C3A C7A   | 1.374(5) | C3B C7B   | 1.375(5) |
| C5A C6A   | 1.372(4) | C5B C6B   | 1.375(4) |
| C6A C7A   | 1.402(5) | C6B C7B   | 1.404(4) |
| C8A C9A   | 1.511(4) | C8B C9B   | 1.507(4) |
| C9A C10A  | 1.384(4) | C9B C10B  | 1.385(4) |
| C9A C14A  | 1.388(4) | C9B C14B  | 1.395(4) |
| C10A C11A | 1.404(4) | C10B C11B | 1.392(4) |
| C11A C12A | 1.396(4) | C11B C12B | 1.401(4) |
| C12A C13A | 1.389(5) | C12B C13B | 1.391(4) |
| C13A C14A | 1.390(4) | C13B C14B | 1.388(4) |
| C14A C15A | 1.502(4) | C14B C15B | 1.507(4) |

**Table 5 Bond Angles for 2018ncs0092s.**

| Atom Atom Atom | Angle/°  | Atom Atom Atom | Angle/°  |
|----------------|----------|----------------|----------|
| C1A N1A C4A    | 111.2(3) | C1B N1B C4B    | 110.6(3) |
| C4A N2A C5A    | 114.2(3) | C4B N2B C5B    | 114.7(3) |
| O1A C1A N1A    | 125.5(3) | O1B C1B N1B    | 124.5(3) |
| O1A C1A C2A    | 126.3(3) | O1B C1B C2B    | 127.1(3) |
| N1A C1A C2A    | 108.2(3) | N1B C1B C2B    | 108.4(3) |
| C1A C2A C8A    | 113.4(3) | C1B C2B C8B    | 112.7(3) |
| C1A C2A C15A   | 112.2(3) | C1B C2B C15B   | 113.4(3) |
| C3A C2A C1A    | 102.0(2) | C3B C2B C1B    | 102.0(2) |
| C3A C2A C8A    | 113.0(3) | C3B C2B C8B    | 111.4(2) |
| C3A C2A C15A   | 112.9(3) | C3B C2B C15B   | 114.0(3) |
| C8A C2A C15A   | 103.7(2) | C15B C2B C8B   | 103.8(2) |
| C4A C3A C2A    | 108.7(3) | C4B C3B C2B    | 108.8(3) |
| C7A C3A C2A    | 133.4(3) | C7B C3B C2B    | 133.7(3) |
| C7A C3A C4A    | 117.8(3) | C7B C3B C4B    | 117.5(3) |
| N1A C4A C3A    | 109.8(3) | N2B C4B N1B    | 123.3(3) |
| N2A C4A N1A    | 123.6(3) | N2B C4B C3B    | 126.6(3) |
| N2A C4A C3A    | 126.6(3) | C3B C4B N1B    | 110.1(3) |
| N2A C5A C6A    | 124.0(3) | N2B C5B C6B    | 123.7(3) |
| C5A C6A C7A    | 120.0(3) | C5B C6B C7B    | 119.8(3) |
| C3A C7A C6A    | 117.4(3) | C3B C7B C6B    | 117.7(3) |
| C9A C8A C2A    | 102.9(2) | C9B C8B C2B    | 102.8(2) |
| C10A C9A C8A   | 128.3(3) | C10B C9B C8B   | 128.3(3) |
| C10A C9A C14A  | 121.3(3) | C10B C9B C14B  | 121.2(3) |
| C14A C9A C8A   | 110.3(3) | C14B C9B C8B   | 110.5(3) |



|                |          |                |          |
|----------------|----------|----------------|----------|
| C9A C10A C11A  | 119.1(3) | C9B C10B C11B  | 119.6(3) |
| N3A C11A C10A  | 119.9(3) | N3B C11B C12B  | 120.2(3) |
| N3A C11A C12A  | 120.5(3) | C10B C11B N3B  | 120.2(3) |
| C12A C11A C10A | 119.5(3) | C10B C11B C12B | 119.5(3) |
| C13A C12A C11A | 120.8(3) | C13B C12B C11B | 120.3(3) |
| C12A C13A C14A | 119.5(3) | C14B C13B C12B | 120.1(3) |
| C9A C14A C13A  | 119.8(3) | C9B C14B C15B  | 110.7(3) |
| C9A C14A C15A  | 110.8(3) | C13B C14B C9B  | 119.2(3) |
| C13A C14A C15A | 129.4(3) | C13B C14B C15B | 130.1(3) |
| C14A C15A C2A  | 103.0(2) | C14B C15B C2B  | 102.8(2) |

**Table 6 Hydrogen Atom Coordinates ( $\text{\AA} \times 10^4$ ) and Isotropic Displacement Parameters ( $\text{\AA}^2 \times 10^3$ ) for 2018ncs0092s.**

| Atom | x     | y    | z     | U(eq) |
|------|-------|------|-------|-------|
| H5A  | -1194 | 3473 | 10995 | 29    |
| H6A  | 382   | 2835 | 9904  | 33    |
| H7A  | 1149  | 3650 | 8245  | 31    |
| H8AA | -1269 | 4807 | 5558  | 28    |
| H8AB | -796  | 5764 | 5211  | 28    |
| H10A | 322   | 4199 | 3793  | 28    |
| H12A | 5367  | 4225 | 5984  | 33    |
| H13A | 5141  | 5095 | 7831  | 31    |
| H15A | 2293  | 6336 | 7828  | 31    |
| H15B | 2798  | 5557 | 8998  | 31    |
| H5B  | 6082  | 8018 | -1005 | 29    |

|      |           |          |          |        |
|------|-----------|----------|----------|--------|
| H6B  | 4595      | 8675     | 163      | 31     |
| H7B  | 3853      | 7858     | 1839     | 30     |
| H8BA | 2199      | 5937     | 1045     | 28     |
| H8BB | 2689      | 5165     | 2227     | 28     |
| H10B | -176      | 6424     | 2103     | 27     |
| H12B | 1864      | 7750     | 5977     | 32     |
| H13B | 4513      | 7280     | 6274     | 31     |
| H15C | 5759      | 5749     | 4875     | 28     |
| H15D | 6226      | 6707     | 4527     | 28     |
| H3AA | 4100(50)  | 3490(30) | 3630(40) | 46(10) |
| H3BA | -1910(50) | 7370(30) | 2980(50) | 51(11) |
| H3BB | -1110(50) | 7810(30) | 4470(40) | 52(12) |
| H3AB | 2360(50)  | 3190(30) | 3210(50) | 56(12) |
| H1B  | 7060(50)  | 5170(30) | 950(50)  | 49(12) |
| H1A  | -2150(50) | 6300(30) | 9040(40) | 51(12) |

### Crystal structure determination of 2018ncs0092s

**Crystal Data** for  $C_{15}H_{13}N_3O$  ( $M = 251.28$  g/mol): monoclinic, space group  $P2_1$  (no. 4),  $a = 8.71373(14)$  Å,  $b = 15.1311(2)$  Å,  $c = 9.8448(2)$  Å,  $\beta = 113.968(2)^\circ$ ,  $V = 1186.09(4)$  Å<sup>3</sup>,  $Z = 4$ ,  $T = 99.99(10)$  K,  $\mu(\text{CuK}\alpha) = 0.735$  mm<sup>-1</sup>,  $D_{\text{calc}} = 1.407$  g/cm<sup>3</sup>, 15858 reflections measured ( $9.832^\circ \leq 2\theta \leq 136.488^\circ$ ), 4251 unique ( $R_{\text{int}} = 0.0388$ ,  $R_{\text{sigma}} = 0.0337$ ) which were used in all calculations. The final  $R_1$  was 0.0370 ( $I > 2\sigma(I)$ ) and  $wR_2$  was 0.1036 (all data).

## 2. <sup>1</sup>H NMR /LCMS/HPLC Traces of Compound 12

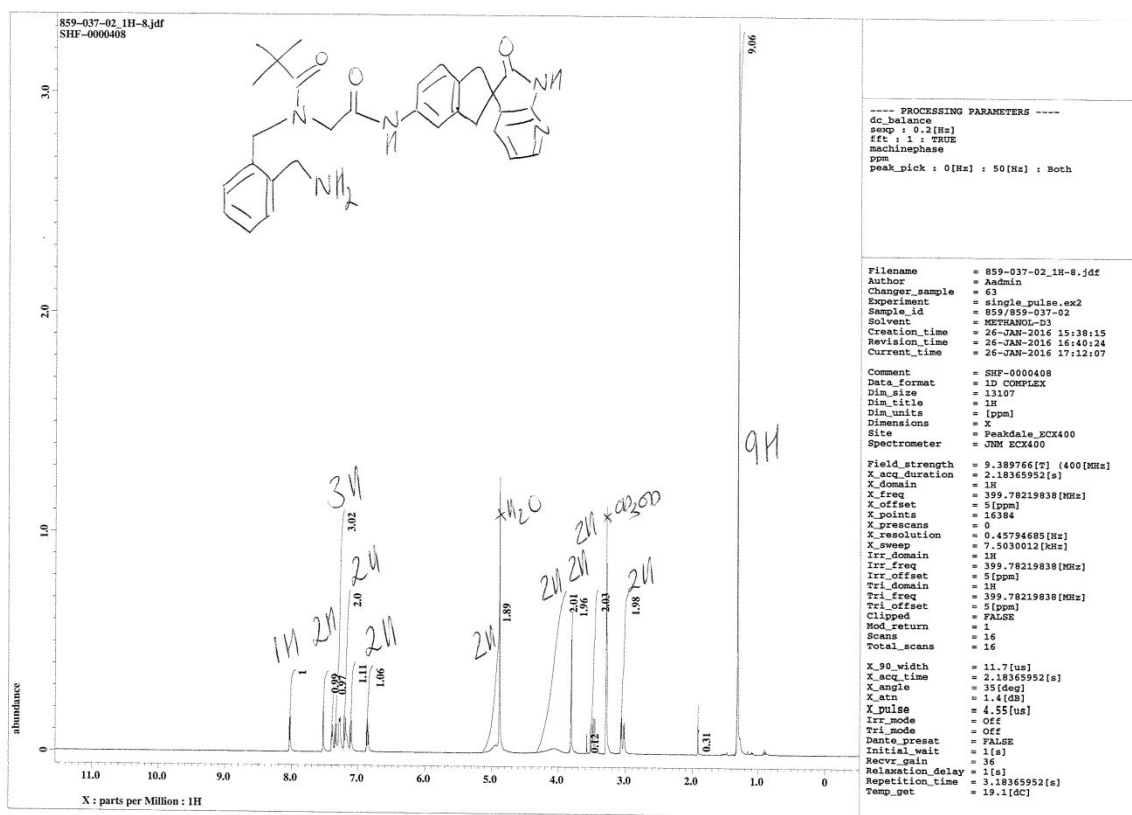

Openlynx Report UPLC2 - XBC18 LONG BASE 2to98 METHOD Keith Statham

XBridge C18 2.5um  
2.1 x 50mm column

C: 10mM NH4HCO3 @ pH10  
B: MeCN

2-98% B in 4min hold @ 98% B  
to 4.6min

Batch:Keith Statham240-1  
Date:26-Jan-2016  
Description:SHF-0000408

ID:859-037-02  
Time:15:26:12

Vial:2:27  
Method:C:\MassLynx\Long basic 2to98.olp

Printed: Tue Jan 26 15:32:46 2016

Sample Report:

Sample 1 Vial 2:27 ID 859-037-02 File Keith Statham240-1 Date 26-Jan-2016 Time 15:26:12 Description SHF-0000408 Method C:\MassLyn

3: UV Detector: TIC

3.307e+1  
Range: 3.555e+1

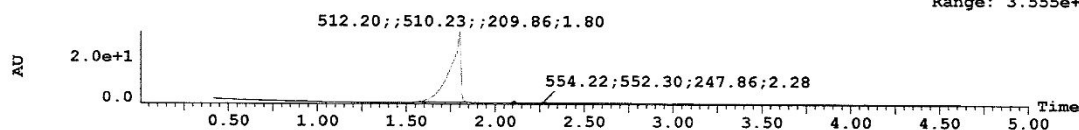

| Peak Number | Time | Compound | Area %Total | Mass Found     |
|-------------|------|----------|-------------|----------------|
| 1           | 1.80 | Found    | 97.80       | 511.26, 511.26 |
| 3           | 2.11 |          | 0.75        |                |
| 4           | 2.28 |          | 0.78        |                |
| 5           | 2.46 | Found    | 0.55        | 511.26         |
| 6           | 2.61 |          | 0.12        |                |

1: MS ES+ :TIC

2.2e+008

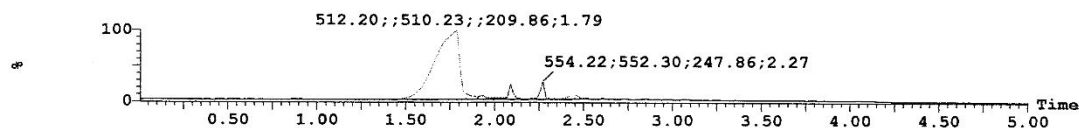

1: MS ES+ :512.26 1.0000Da

1.1e+008

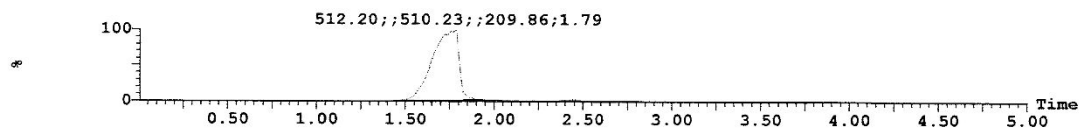

2: MS ES- :TIC

4.1e+006

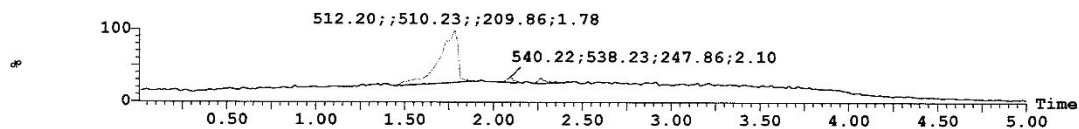

2: MS ES- :510.26 1.0000Da

2.1e+006

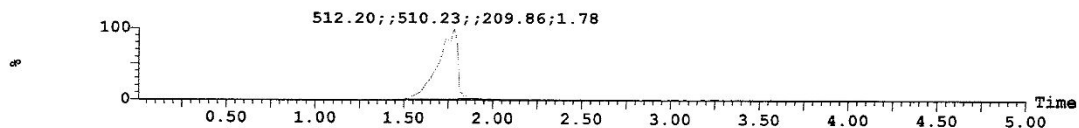

Openlynx Report UPLC2 - XBC18 LONG BASE 2to98 METHOD Keith Statham

XBridge C18 2.5um  
2.1 x 50mm column

C: 10mM NH4HCO3 @ pH10  
B: MeCN

2-98% B in 4min hold @ 98% B  
to 4.6min

Batch:Keith Statham240-1  
Date:26-Jan-2016  
Description:SHF-0000408

ID:859-037-02  
Time:15:26:12

Vial:2:27  
Method:C:\MassLynx\Long basic 2to98.olp

Printed: Tue Jan 26 15:32:46 2016

Sample Report (continued):

| Time | Mass Found | Peak ID | Compound |
|------|------------|---------|----------|
| 1.79 | 512.26     | 1       | Found    |

1:MS ES+  
6.9e+007

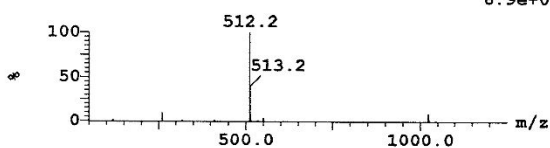

| Time | Mass Found | Peak ID | Compound |
|------|------------|---------|----------|
| 1.79 | 510.26     | 1       | Found    |

2:MS ES-  
1.9e+006

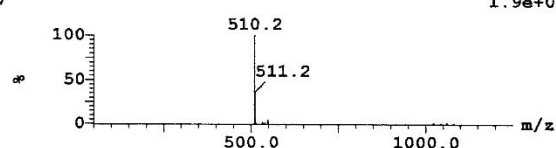

| Time | Mass Found | Peak ID | Compound |
|------|------------|---------|----------|
| 1.94 |            | 2       |          |

1:MS ES+  
1.8e+006

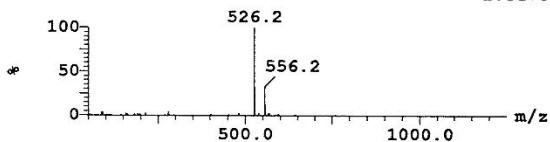

| Time | Mass Found | Peak ID | Compound |
|------|------------|---------|----------|
| 2.09 |            | 3       |          |

1:MS ES+  
1.5e+007

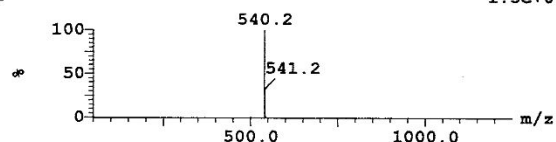

| Time | Mass Found | Peak ID | Compound |
|------|------------|---------|----------|
| 2.27 |            | 4       |          |

1:MS ES+  
1.8e+007

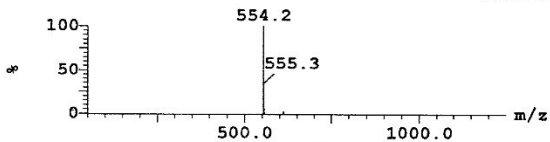

| Time | Mass Found | Peak ID | Compound |
|------|------------|---------|----------|
| 2.44 | 512.26     | 5       | Found    |

1:MS ES+  
2.1e+006

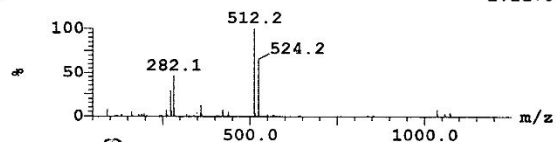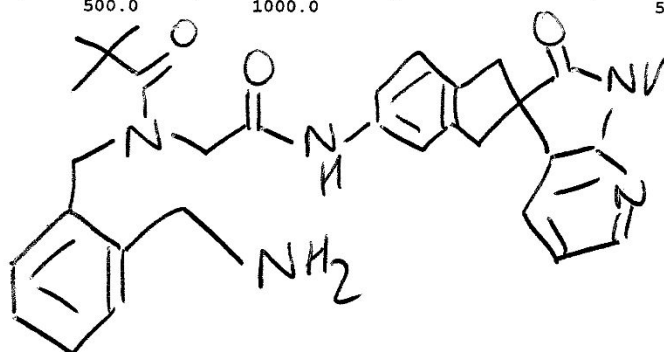



# 79985

RFA 79985  
Method: 11m 1ml 5to95%C with D2  
Sample Set: 79985b  
Acquisition date: 12/14/2015 1:16:51 PM GMT  
Column Type: XBC18 3x150 5um  
Project Name: Yellowforms\_Dec\_15  
Solvent D line:

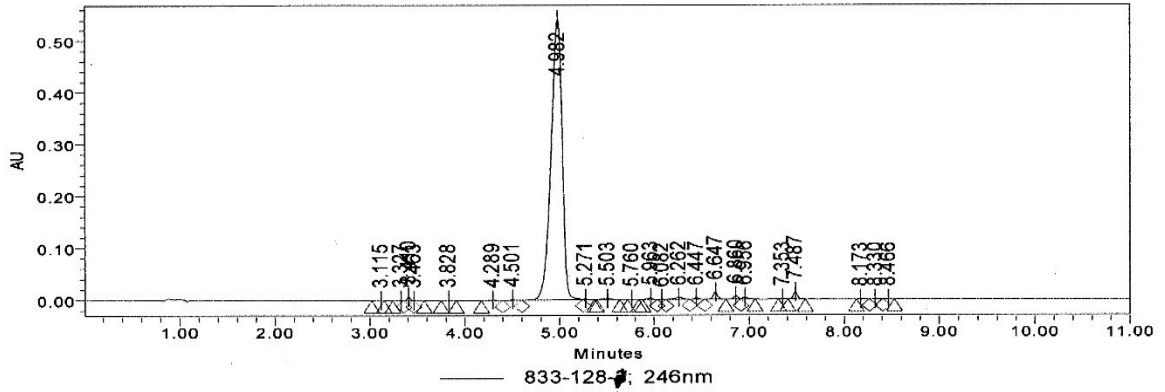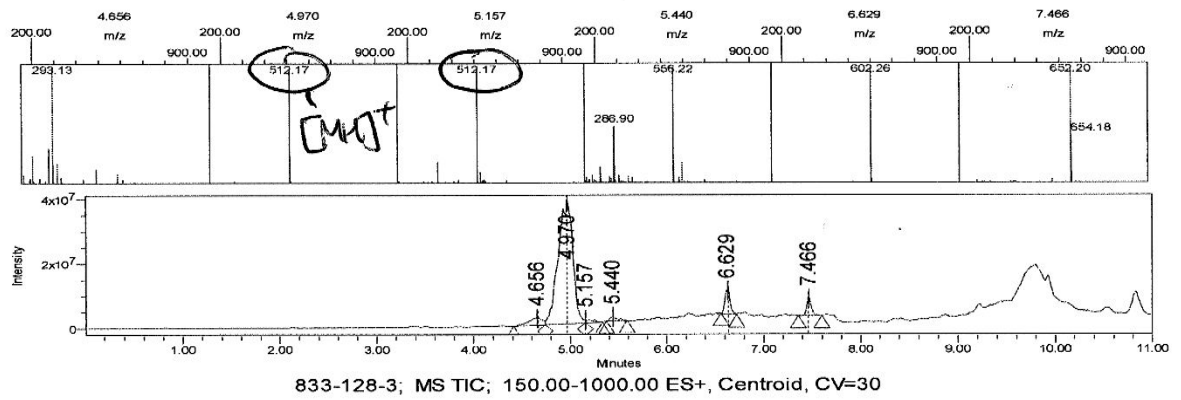

833-128-3; MS TIC; 150.00-1000.00 ES+, Centroid, CV=30

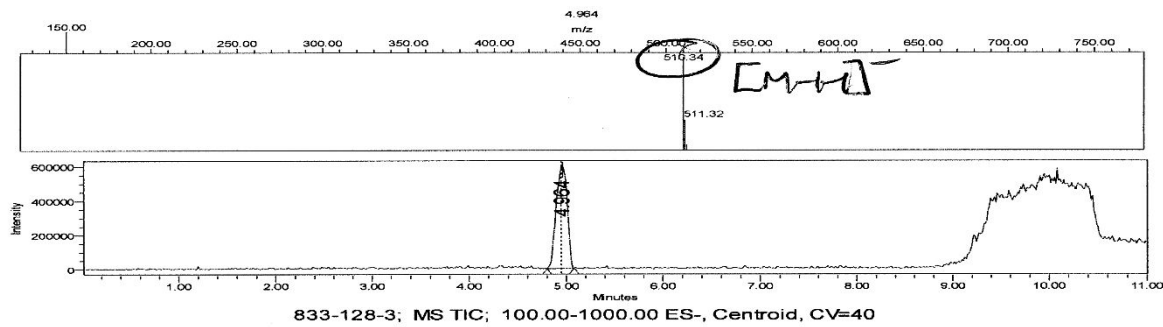

833-128-3; MS TIC; 100.00-1000.00 ES-, Centroid, CV=40

|    | Retention Time (min) | % Area |
|----|----------------------|--------|
| 1  | 3.115                | 0.03   |
| 2  | 3.327                | 0.04   |
| 3  | 3.410                | 0.35   |
| 4  | 3.463                | 0.03   |
| 5  | 3.828                | 0.04   |
| 6  | 4.289                | 0.11   |
| 7  | 4.501                | 0.13   |
| 8  | 4.982                | 94.84  |
| 9  | 5.271                | 0.12   |
| 10 | 5.503                | 0.30   |
| 11 | 5.760                | 0.03   |
| 12 | 5.963                | 0.27   |
| 13 | 6.082                | 0.06   |
| 14 | 6.262                | 0.54   |
| 15 | 6.447                | 0.24   |
| 16 | 6.647                | 0.96   |
| 17 | 6.860                | 0.46   |
| 18 | 6.956                | 0.34   |
| 19 | 7.353                | 0.07   |
| 20 | 7.487                | 0.89   |
| 21 | 8.173                | 0.04   |
| 22 | 8.330                | 0.07   |
| 23 | 8.466                | 0.05   |

#### 4. <sup>1</sup>H NMR /LCMS/HPLC Traces of Compound (±)-25

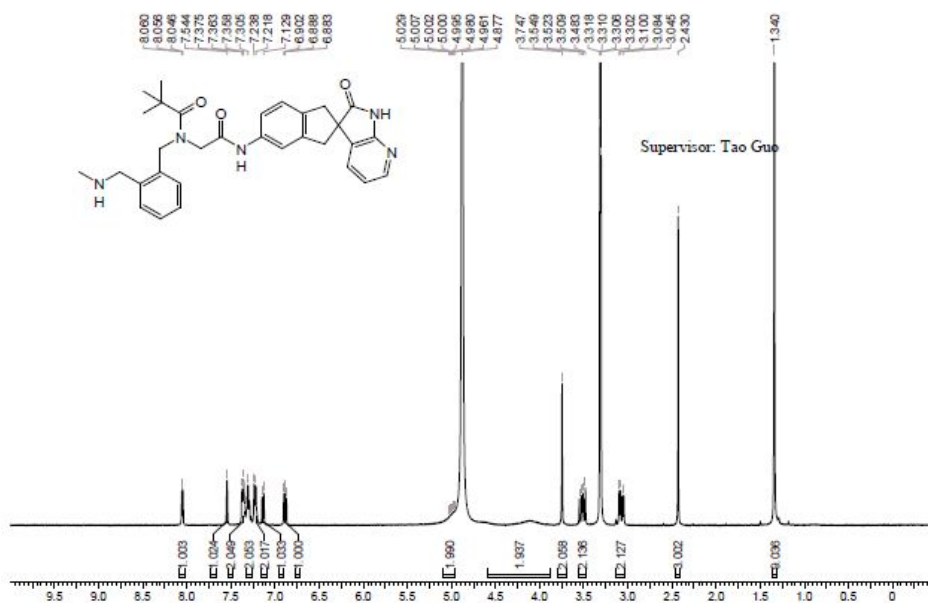

Acquisition Time (sec) 4.0894  
 Comment EW9135-8  
 75-PIF  
 MeOD  
 Bruker\_F  
 400MHz  
 Date 12 Nov 2018  
 11:46:32  
 Frequency (MHz) 400.1700  
 Nucleus 1H  
 Number of Transients 8  
 Origin spect  
 Original Points Count 32768  
 Owner nmrsu  
 Points Count 65536  
 Pulse Sequence zg30  
 Receiver Gain 90.28  
 SW(cyclical) (Hz) 8012.82  
 Solvent METHAN  
 OL-d4  
 Spectrum Offset (Hz) 2393.4570  
 Spectrum Type standard  
 Sweep Width (Hz) 8012.70  
 Temperature (degree C) 22.647



# LCMS REPORT

Compound ID : SHF-638  
 Sample ID : EW9135-875-P1F2  
 Injection Vol : 1ul  
 Location : vial55  
 Acq Method : d:\method\0-60AB\_4MIN\_220&254.lcm  
 Org DataFile : D:\DATA\1811\181108\EW9135-875-P1F2.lcd  
 Injection Date : 2018-11-08 18:06:11  
 Instrument : LCMS-A 15-105

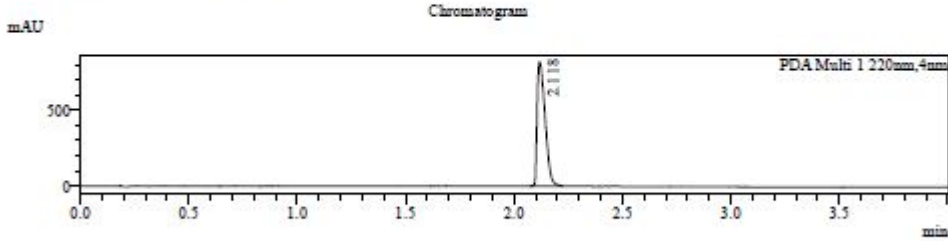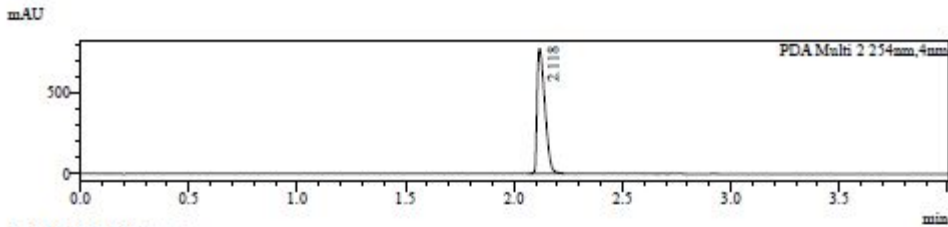

1 PDA Multi 1 / 220nm,4nm  
 2 PDA Multi 2 / 254nm,4nm

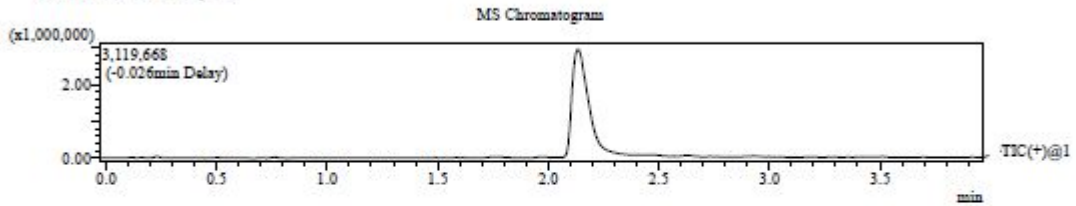

## Integration Result

### Peak Table

| PDA Ch1 220nm |           |        |         |           |         |         |
|---------------|-----------|--------|---------|-----------|---------|---------|
| Peak#         | Ret. Time | Height | Height% | USP Width | Area    | Area%   |
| 1             | 2.118     | 818049 | 100.000 | 0.069     | 2103246 | 100.000 |

### Peak Table

| PDA Ch2 254nm |           |        |         |           |         |         |
|---------------|-----------|--------|---------|-----------|---------|---------|
| Peak#         | Ret. Time | Height | Height% | USP Width | Area    | Area%   |
| 1             | 2.118     | 770206 | 100.000 | 0.068     | 1917202 | 100.000 |

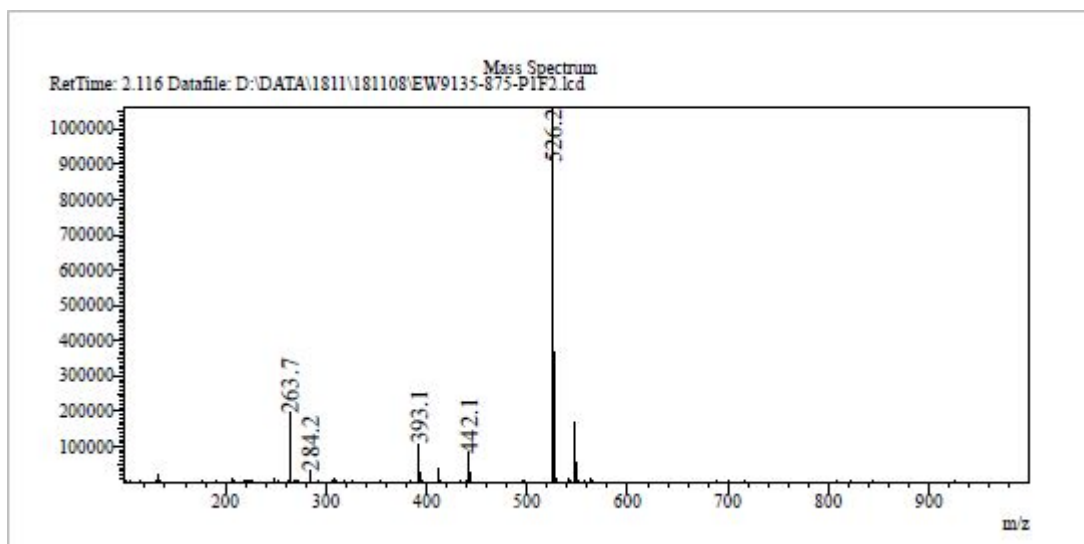

### 5. <sup>1</sup>H NMR /LCMS/HPLC Traces of Compound (R)-25

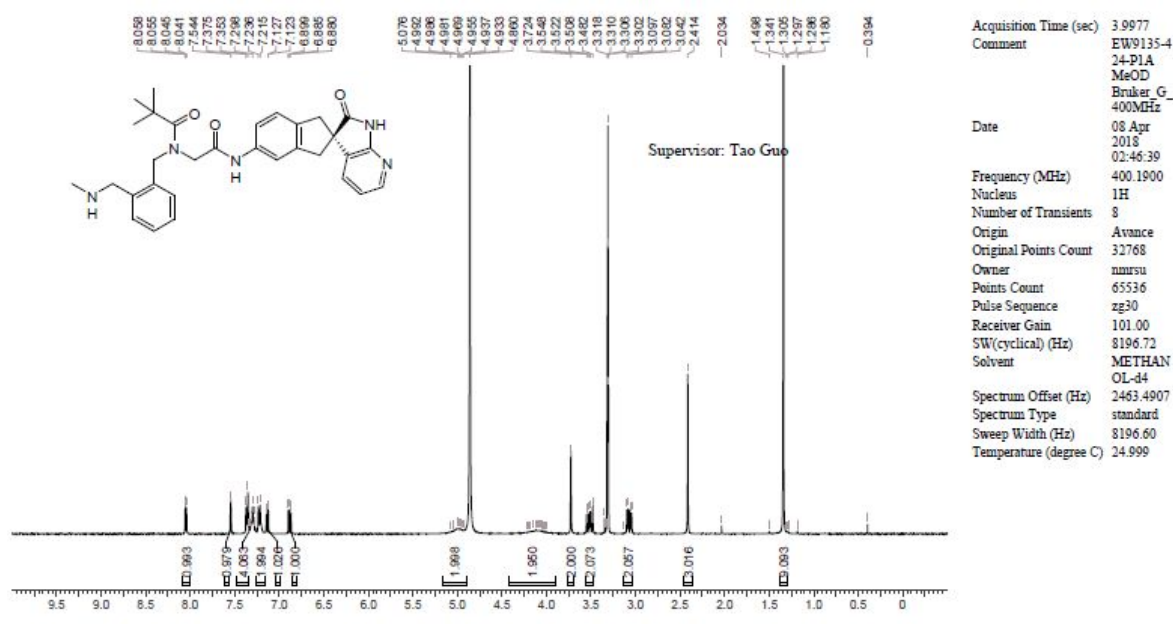

5

# LCMS REPORT

Compound ID : vSHF-771  
 Sample ID : EW9135-424-P1A1  
 Injection Vol : 1ul  
 Location : vial94  
 Acq Method : d:\method\0-60AB\_4MIN\_220&254.lcm  
 Org DataFile : D:\DATA\1804\180408\EW9135-424-P1A1.lcd  
 Injection Date : 2018-04-08 18:24:37  
 Instrument : LCMS-A 15-105

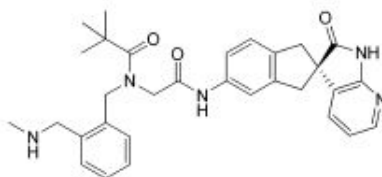

Chemical Formula: C<sub>31</sub>H<sub>39</sub>N<sub>5</sub>O<sub>3</sub>  
 Molecular Weight: 525.64

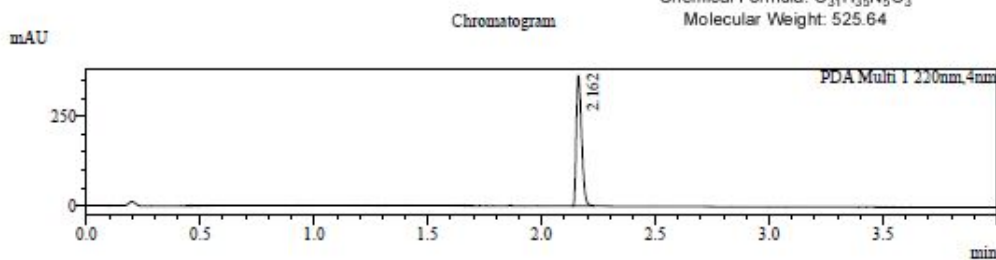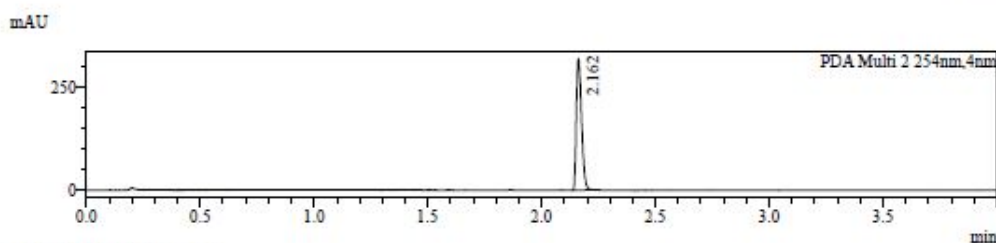

- 1 PDA Multi 1 / 220nm, 4nm
- 2 PDA Multi 2 / 254nm, 4nm

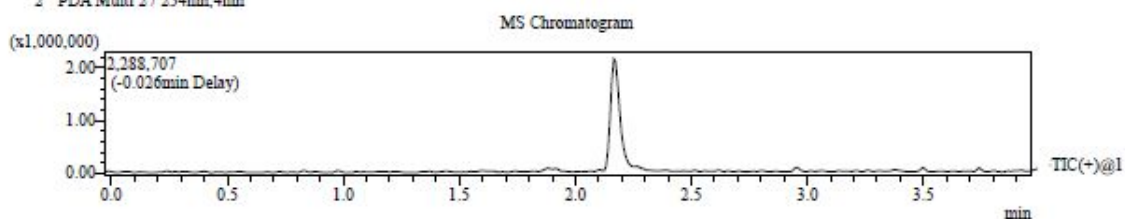

## Integration Result

### Peak Table

| PDA Ch1 220nm |           |        |         |           |        |         |  |
|---------------|-----------|--------|---------|-----------|--------|---------|--|
| Peak#         | Ret. Time | Height | Height% | USP Width | Area   | Area%   |  |
| 1             | 2.162     | 364974 | 100.000 | 0.044     | 591308 | 100.000 |  |

### Peak Table

| PDA Ch2 254nm |           |        |         |           |        |         |  |
|---------------|-----------|--------|---------|-----------|--------|---------|--|
| Peak#         | Ret. Time | Height | Height% | USP Width | Area   | Area%   |  |
| 1             | 2.162     | 320982 | 100.000 | 0.044     | 515144 | 100.000 |  |

Mass Spectrum  
RetTime: 2.166 Datafile: D:\DATA\1804\180408\EW9135-424-PIA1.lcd

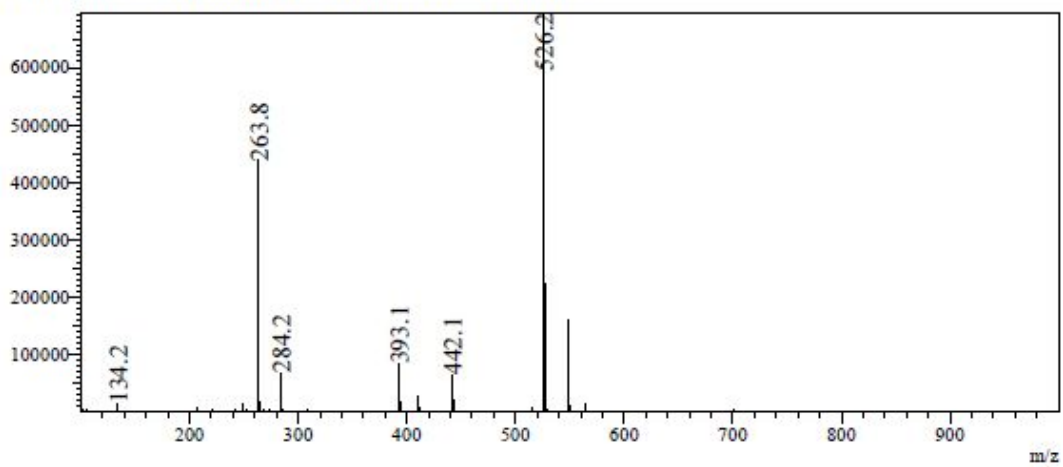

Supplement: jm0c02191_si_006.pdf [file jm0c02191_si_006.pdf]
